# Supplementary material
Source: PubMed Central journal article supplement (PMC7440755)
Supplement: ry182122suppa1.pdf [file ry182122suppa1.pdf]

**Table E1: All modalities compared with reference standard for correct localization**

|                                 |            | OVERALL<br>(n = 1600) |      | MULTIGLAND<br>(n = 320) |     | SINGLE GLAND<br>(n = 1280) |     |
|---------------------------------|------------|-----------------------|------|-------------------------|-----|----------------------------|-----|
|                                 |            | REFERENCE<br>STANDARD |      | REFERENCE<br>STANDARD   |     | REFERENCE<br>STANDARD      |     |
|                                 |            | POS                   | NEG  | POS                     | NEG | POS                        | NEG |
| <b>OVERALL</b>                  |            | 522                   | 1078 | 201                     | 119 | 321                        | 959 |
| <b>4D-CT</b>                    | <b>POS</b> | 414                   | 47   | 117                     | 14  | 297                        | 33  |
|                                 | <b>NEG</b> | 108                   | 1031 | 84                      | 105 | 24                         | 926 |
| <b>Sestamibi SPEC/CT</b>        | <b>POS</b> | 303                   | 13   | 62                      | 5   | 241                        | 8   |
|                                 | <b>NEG</b> | 219                   | 1065 | 139                     | 114 | 80                         | 951 |
| <b>4D-CT + MIBI (Specific)</b>  | <b>POS</b> | 297                   | 9    | 62                      | 2   | 235                        | 7   |
|                                 | <b>NEG</b> | 225                   | 1069 | 139                     | 117 | 86                         | 952 |
| <b>4D-CT + MIBI (Sensitive)</b> | <b>POS</b> | 420                   | 51   | 117                     | 17  | 303                        | 34  |
|                                 | <b>NEG</b> | 102                   | 1027 | 84                      | 102 | 18                         | 925 |

**Table E2: AUCs of all modalities, corrected for within-patient correlation**

|                                           | AUC   | 95% Confidence Interval | P value         |
|-------------------------------------------|-------|-------------------------|-----------------|
| <b>4DCT-corrected</b>                     | 0.928 | (0.911–0.944)           | <i>P</i> < .001 |
| <b>Sestamibi-corrected</b>                | 0.887 | (0.868–0.906)           | <i>P</i> < .001 |
| <b>4D-CT + MIBI (Sensitive)-corrected</b> | 0.930 | (0.914–0.946)           | <i>P</i> < .001 |
| <b>4D-CT + MIBI (Specific)-corrected</b>  | 0.783 | (0.755–0.810)           | <i>P</i> < .001 |

**Notes**-AUC using Generalized linear models and generalized estimating equations to take into account intrapatient correlation. Type of model: binary logistic. Subject variables: patient ID. Within-subject variables: gland location. Predictors: Gland of interest positivity, other glands positivity. Dependent response variable: Pathology of the gland of interest. Working correlation structure: Independence.
